# Supplementary material for: Comprehensive Transcriptome Profiling Uncovers Molecular Mechanisms and Potential Candidate Genes Associated with Heat Stress Response in Chickpea
Source: MDPI journal article supplement (doi:10.3390/ijms24021369), 2023-01-10
Supplement: s1 [file s1]

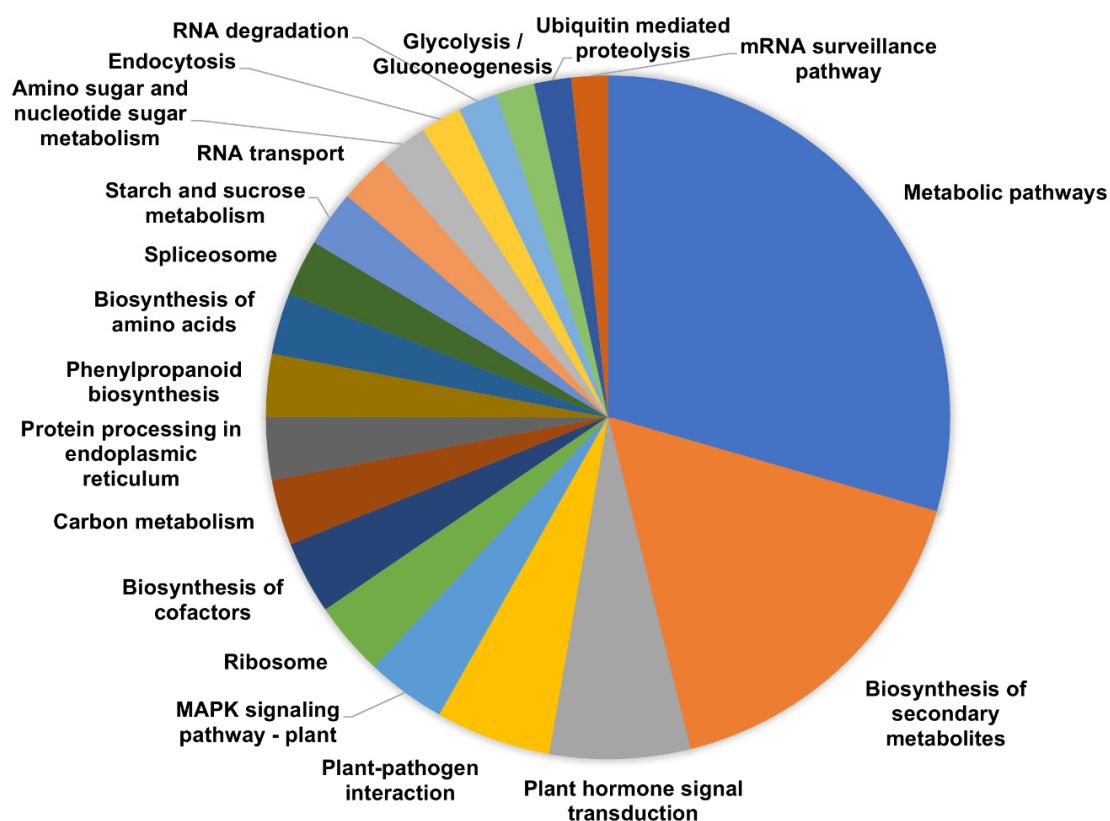

**Supplementary Figure S1: KEGG pathway analysis of differentially expressed genes (DEGs) under heat stress in chickpea.** The pie chart represents major pathways represented by DEGs under high temperature stress conditions in chickpea.
